# Supplementary material for: Association between On-Treatment Haemoglobin A1c and All-Cause Mortality in Individuals with Type 2 Diabetes: Importance of Personalized Goals and Type of Anti-Hyperglycaemic Treatment
Source: PubMed Central journal article supplement (PMC7019548; doi:10.3390/jcm9010246), 2020-01-17
Supplement: jcm-09-00246-s001.pdf [file jcm-09-00246-s001.pdf]

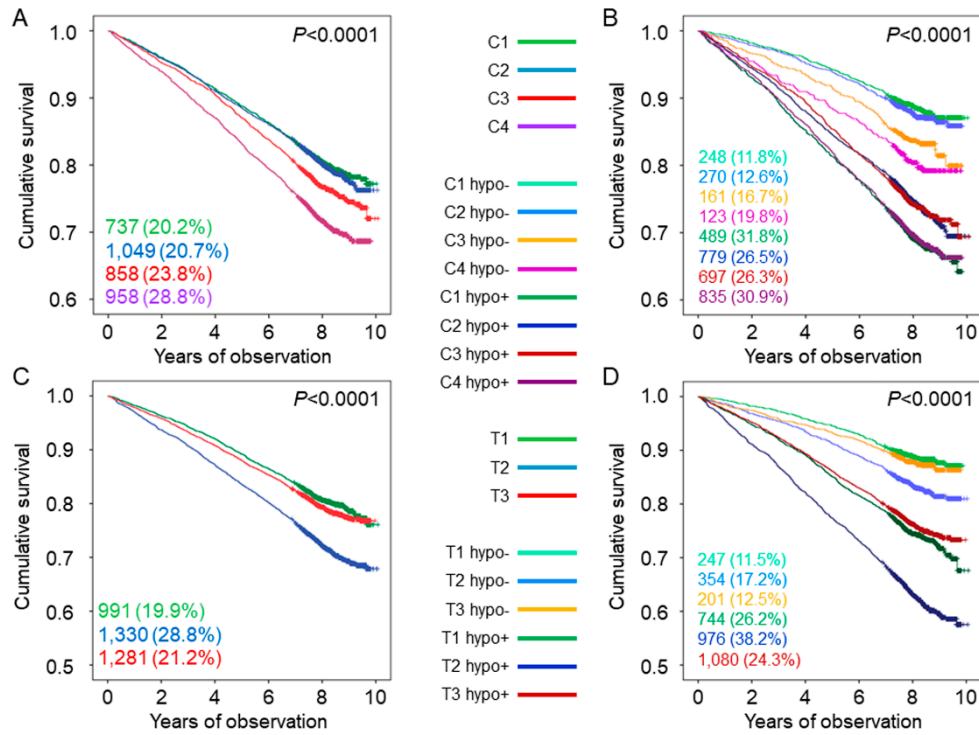

**Figure S1.** Kaplan-Meier survival curves for all-cause mortality by HbA<sub>1c</sub> and HbA<sub>1c</sub> target categories. Cumulative survival by Kaplan-Meier analysis by HbA<sub>1c</sub> categories (A), HbA<sub>1c</sub> categories plus use of agents causing hypoglycaemia (B), HbA<sub>1c</sub> target categories (C), and HbA<sub>1c</sub> target categories plus use of agents causing hypoglycaemia (D). Number (percentage) of deaths or HRs (95% CI) for mortality are shown for each category. HbA<sub>1c</sub> = haemoglobin A<sub>1c</sub>; HR = hazard ratio; CI = confidence interval; C1 = HbA<sub>1c</sub> <6.5%; C2 = HbA<sub>1c</sub> 6.5%-7.49%; C3 = HbA<sub>1c</sub> 7.5%-8.49%; C4 = HbA<sub>1c</sub> ≥8.5%; T1 = HbA<sub>1c</sub> on-target (≤0.5% below or above personalized goal); T2 = HbA<sub>1c</sub> below-target (>0.5% below personalized goal); T3 = HbA<sub>1c</sub> above-target (>0.5% above personalized goal); hypo- = patients not on agents causing hypoglycaemia; hypo+ = patients on agents causing hypoglycaemia.

**Table S1.** Distribution of study participants according to personalized HbA<sub>1c</sub> goals and target categories.

| Personalized<br>HbA <sub>1c</sub> goals | Target categories |              |              |              |
|-----------------------------------------|-------------------|--------------|--------------|--------------|
|                                         | All               | T1           | T2           | T3           |
| <b>All</b>                              |                   |              |              |              |
| <b>G0</b>                               | 3,859 (24.6)      | 1,401 (28.1) | 674 (14.6)   | 1,784 (29.5) |
| <b>G1</b>                               | 4,776 (30.5)      | 1,557 (31.1) | 1,194 (25.8) | 2,025 (33.5) |
| <b>G2</b>                               | 4,508 (28.8)      | 1,392 (27.9) | 1,553 (33.6) | 1,563 (25.9) |
| <b>G3</b>                               | 2,128 (13.6)      | 548 (11.0)   | 969 (21.0)   | 611 (10.1)   |
| <b>G4</b>                               | 385 (2.5)         | 91 (1.8)     | 231 (5.0)    | 63 (1.2)     |
| <b>Total</b>                            | 15,656            | 4,989 (31.9) | 4,621 (29.5) | 6,046 (38.6) |
| <b>Hypo-</b>                            |                   |              |              |              |
| <b>G0</b>                               | 2,331 (40.0)      | 1,019 (47.3) | 526 (25.5)   | 786 (48.9)   |
| <b>G1</b>                               | 1,871 (32.1)      | 666 (30.9)   | 709 (34.4)   | 496 (30.8)   |
| <b>G2</b>                               | 1,184 (20.3)      | 369 (17.1)   | 574 (27.8)   | 241 (15.0)   |
| <b>G3</b>                               | 383 (6.6)         | 93 (4.3)     | 213 (10.3)   | 77 (4.8)     |
| <b>G4</b>                               | 57 (1.0)          | 7 (0.3)      | 42 (2.0)     | 8 (0.5)      |
| <b>Total</b>                            | 5,826             | 2,154 (37.0) | 2,064 (35.4) | 1,608 (27.6) |
| <b>Hypo+</b>                            |                   |              |              |              |
| <b>G0</b>                               | 1,528 (15.5)      | 382 (13.5)   | 148 (5.8)    | 998 (22.5)   |
| <b>G1</b>                               | 2,905 (29.6)      | 891 (31.4)   | 485 (19.0)   | 1,529 (34.5) |
| <b>G2</b>                               | 3,324 (33.8)      | 1,023 (36.1) | 979 (38.3)   | 1,322 (29.8) |
| <b>G3</b>                               | 1,745 (17.8)      | 455 (16.0)   | 756 (29.6)   | 534 (12.0)   |
| <b>G4</b>                               | 328 (3.3)         | 84 (3.0)     | 189 (7.4)    | 55 (1.2)     |
| <b>Total</b>                            | 9,830             | 2,835 (28.8) | 2,557 (26.0) | 4,438 (45.2) |

HbA<sub>1c</sub> = haemoglobin A<sub>1c</sub>; G0 = personalized HbA<sub>1c</sub> goal <6.5%; G1 = personalized HbA<sub>1c</sub> goal <7.0%; G2 = personalized HbA<sub>1c</sub> goal <7.5%; G3 = personalized HbA<sub>1c</sub> goal <8.0%; G4 = personalized HbA<sub>1c</sub> goal <8.5%; T1 = HbA<sub>1c</sub> on-target ( $\leq 0.5\%$  below or above personalized goal); T2 = HbA<sub>1c</sub> below-target ( $> 0.5\%$  below personalized goal); T3 = HbA<sub>1c</sub> above-target ( $> 0.5\%$  above personalized goal); hypo- = patients not on agents causing hypoglycaemia; hypo+ = patients on agents causing hypoglycaemia.

**Table S2.** Baseline clinical features of study participants by HbA<sub>1c</sub> categories plus use of agents causing hypoglycaemia.

| Variables                                       | Hypo-        |              |             |             | Hypo+        |              |              |              | P      |
|-------------------------------------------------|--------------|--------------|-------------|-------------|--------------|--------------|--------------|--------------|--------|
|                                                 | C1           | C2           | C3          | C4          | C1           | C2           | C3           | C4           |        |
| N (%)                                           | 2,107 (13.5) | 2,137 (13.6) | 962 (6.1)   | 620 (4.0)   | 1,538 (9.8)  | 2,944 (18.8) | 2,646 (16.9) | 2,702 (17.3) |        |
| Deaths, n (%)                                   | 248 (11.8%)  | 270 (12.6%)  | 161 (16.7%) | 123 (19.8%) | 489 (31.8%)  | 779 (26.5%)  | 697 (26.3%)  | 835 (30.9%)  | <0.001 |
| Age, years                                      | 63.5±10.1    | 65.0±9.8     | 64.9±10.3   | 64.2±11.4   | 68.6±10.4    | 68.6±9.7     | 68.0±10.0    | 66.8±10.6    | <0.001 |
| Male gender, n (%)                              | 1,256 (59.6) | 1,193 (55.8) | 547 (56.9)  | 338 (54.5)  | 977 (63.5)   | 1,710 (58.1) | 1,471 (55.6) | 1,410 (52.2) | <0.001 |
| Smoking, n (%)                                  |              |              |             |             |              |              |              |              | 0.01   |
| Never                                           | 1,175 (55.8) | 1,204 (56.3) | 552 (57.4)  | 340 (54.8)  | 846 (55.0)   | 1,646 (55.9) | 1,538 (58.1) | 1,548 (57.3) |        |
| Former                                          | 631 (29.9)   | 606 (28.4)   | 269 (28.0)  | 166 (26.8)  | 476 (30.9)   | 866 (29.4)   | 691 (26.1)   | 702 (26.0)   |        |
| Current                                         | 301 (14.3)   | 327 (15.3)   | 141 (14.7)  | 114 (18.4)  | 216 (14.0)   | 432 (14.7)   | 417 (15.8)   | 452 (16.7)   |        |
| Diabetes duration, years                        | 6.5±7.2      | 9.2±9.0      | 12.8±9.8    | 12.9±11.3   | 12.5±9.8     | 14.8±9.9     | 16.8±10.0    | 16.8±9.8     | <0.001 |
| HbA <sub>1c</sub> , %                           | 5.93±0.44    | 6.93±0.28    | 7.89±0.27   | 9.85±1.49   | 5.94±0.48    | 7.01±0.28    | 7.95±0.29    | 9.76±1.26    | <0.001 |
| (mmol·mol <sup>-1</sup> )                       | (41.3±4.8)   | (52.2±3.1)   | (62.7±3.0)  | (84.2±16.3) | (41.4±5.2)   | (53.1±3.1)   | (63.4±3.2)   | (83.2±13.8)  |        |
| BMI, kg·m <sup>-2</sup>                         | 29.1±5.0     | 29.3±5.0     | 29.7±5.2    | 30.2±5.5    | 27.8±4.7     | 28.2±4.8     | 28.8±5.2     | 29.6±5.5     | <0.001 |
| Waist circumference, cm                         | 102.9±10.1   | 103.2±10.1   | 104.1±10.6  | 105.0±11.3  | 100.3±9.7    | 100.9±9.7    | 102.2±10.6   | 103.8±11.0   | <0.001 |
| Triglycerides, mmol·l <sup>-1</sup>             | 1.48±0.94    | 1.53±0.89    | 1.61±0.91   | 1.93±1.43   | 1.42±0.95    | 1.45±0.82    | 1.54±0.88    | 1.83±1.24    | <0.001 |
| Total cholesterol, mmol·l <sup>-1</sup>         | 4.85±0.95    | 4.86±0.96    | 4.80±0.93   | 5.01±1.14   | 4.59±0.96    | 4.70±0.95    | 4.73±0.97    | 4.86±1.08    | <0.001 |
| HDL cholesterol, mmol·l <sup>-1</sup>           | 1.32±0.35    | 1.30±0.33    | 1.26±0.31   | 1.20±0.32   | 1.30±0.37    | 1.32±0.37    | 1.29±0.36    | 1.25±0.36    | <0.001 |
| LDL cholesterol, mmol·l <sup>-1</sup>           | 3.53±0.92    | 3.57±0.92    | 3.54±0.91   | 3.80±1.10   | 3.29±0.91    | 3.38±0.90    | 3.44±0.92    | 3.61±1.03    | <0.001 |
| Non-HDL cholesterol, mmol·l <sup>-1</sup>       | 2.87±0.84    | 2.87±0.83    | 2.82±0.81   | 2.95±0.90   | 2.66±0.83    | 2.73±0.82    | 2.74±0.83    | 2.80±0.90    | <0.001 |
| Systolic BP, mmHg                               | 135.5±16.6   | 136.6±16.8   | 139.6±18.0  | 137.9±17.6  | 137.3±18.7   | 138.8±18.4   | 139.6±18.2   | 138.8±18.9   | <0.001 |
| Diastolic BP, mmHg                              | 79.6±9.2     | 79.5±8.9     | 80.6±9.4    | 79.9±9.0    | 78.2±9.6     | 77.9±9.4     | 78.2±9.5     | 78.4±9.8     | <0.001 |
| Pulse pressure, mmHg                            | 55.9±14.3    | 57.1±14.8    | 58.9±15.0   | 57.9±14.9   | 59.1±16.3    | 60.9±16.0    | 61.4±16.2    | 60.4±15.9    | <0.001 |
| Anti-hyperglycaemic treatment, n (%)            |              |              |             |             |              |              |              |              |        |
| Lifestyle                                       | 1,017 (48.3) | 762 (35.7)   | 192 (20.0)  | 142 (22.9)  | 0 (0.0)      | 0 (0.0)      | 0 (0.0)      | 0 (0.0)      | <0.001 |
| Insulin                                         | 0 (0.0)      | 0 (0.0)      | 0 (0.0)     | 0 (0.0)     | 440 (28.6)   | 913 (31.0)   | 1,062 (40.1) | 1,509 (55.8) | <0.001 |
| Non-insulin agents                              | 1,090 (51.7) | 1,375 (64.3) | 770 (80.0)  | 478 (77.1)  | 1,098 (71.4) | 2,031 (69.0) | 1,584 (59.9) | 1,193 (44.2) | <0.001 |
| Metformin                                       | 1,063 (50.5) | 1,346 (63.0) | 746 (77.5)  | 447 (72.1)  | 683 (44.4)   | 1,494 (50.7) | 1,460 (55.2) | 1,406 (52.0) | <0.001 |
| Pioglitazone                                    | 58 (2.8)     | 84 (3.9)     | 67 (7.0)    | 53 (8.5)    | 29 (1.9)     | 83 (2.8)     | 96 (3.6)     | 84 (3.1)     | <0.001 |
| Acarbose                                        | 15 (0.7)     | 16 (0.7)     | 21 (2.2)    | 20 (3.2)    | 21 (1.4)     | 27 (0.9)     | 26 (1.0)     | 24 (0.9)     | <0.001 |
| Sulfonylureas                                   | 0 (0.0)      | 0 (0.0)      | 0 (0.0)     | 0 (0.0)     | 820 (53.3)   | 1,677 (57.0) | 1,472 (55.6) | 1,281 (47.4) | <0.001 |
| Repaglinide                                     | 0 (0.0)      | 0 (0.0)      | 0 (0.0)     | 0 (0.0)     | 335 (21.8)   | 537 (18.2)   | 371 (14.0)   | 282 (10.4)   | <0.001 |
| Lipid-lowering treatment, n (%)                 | 901 (42.8)   | 1,007 (47.1) | 419 (43.6)  | 263 (42.4)  | 671 (43.6)   | 1,382 (46.9) | 1,309 (49.5) | 1,286 (47.6) | <0.001 |
| Anti-hypertensive treatment, n (%)              | 1,396 (66.3) | 1,458 (68.2) | 664 (69.0)  | 386 (62.3)  | 1,113 (72.4) | 2,153 (73.1) | 1,937 (73.2) | 1,965 (72.7) | <0.001 |
| Albuminuria, mg·day <sup>-1</sup>               | 33.8±148.1   | 46.8±392.8   | 41.6±165.7  | 52.3±217.5  | 81.1±298.6   | 84.7±357.4   | 86.4±371.1   | 106.0±307.0  | <0.001 |
| Serum creatinine, µmol·l <sup>-1</sup>          | 76.0±23.9    | 76.0±30.9    | 76.0±20.3   | 75.1±23.9   | 89.3±50.4    | 84.0±37.1    | 82.2±35.4    | 83.1±33.6    | <0.001 |
| eGFR, ml·min <sup>-1</sup> ·1.73m <sup>-2</sup> | 85.6±18.6    | 84.3±17.8    | 84.1±18.0   | 85.2±20.5   | 76.1±22.8    | 77.3±21.1    | 78.3±21.2    | 77.8±22.8    | <0.001 |
| DKD phenotype, n (%)                            |              |              |             |             |              |              |              |              | <0.001 |
| No DKD                                          | 1,649 (78.3) | 1,600 (74.9) | 679 (70.6)  | 391 (63.1)  | 905 (58.8)   | 1,785 (60.6) | 1,590 (60.1) | 1,385 (51.3) |        |
| Albuminuric DKD with preserved eGFR             | 260 (12.3)   | 323 (15.1)   | 177 (18.4)  | 156 (25.2)  | 272 (17.7)   | 554 (18.8)   | 514 (19.4)   | 710 (26.3)   |        |
| Non-albuminuric DKD                             | 127 (6.0)    | 149 (7.0)    | 73 (7.6)    | 43 (6.9)    | 194 (12.6)   | 316 (10.7)   | 287 (10.8)   | 287 (10.6)   |        |
| Albuminuric DKD with reduced eGFR               | 71 (3.4)     | 65 (3.0)     | 33 (3.4)    | 30 (4.8)    | 167 (10.9)   | 289 (9.8)    | 255 (9.6)    | 320 (11.8)   |        |
| DR, n (%)                                       |              |              |             |             |              |              |              |              | <0.001 |
| No DR                                           | 1,980 (94.0) | 1,967 (92.0) | 817 (84.9)  | 491 (79.2)  | 1,198 (77.9) | 2,218 (75.3) | 1,841 (69.6) | 1,677 (62.1) |        |
| Non-advanced DR                                 | 80 (3.8)     | 115 (5.4)    | 109 (11.3)  | 90 (14.5)   | 162 (10.5)   | 388 (13.2)   | 477 (18.0)   | 526 (19.5)   |        |
| Advanced DR                                     | 47 (2.2)     | 55 (2.6)     | 36 (3.7)    | 39 (6.3)    | 178 (11.6)   | 338 (11.5)   | 328 (12.4)   | 499 (18.5)   |        |

|                                     |            |            |            |            |            |            |            |            |        |  |
|-------------------------------------|------------|------------|------------|------------|------------|------------|------------|------------|--------|--|
| <b>CVD, n (%)</b>                   |            |            |            |            |            |            |            |            |        |  |
| <b>Any</b>                          | 266 (12.6) | 363 (17.0) | 202 (21.0) | 153 (24.7) | 433 (28.2) | 723 (24.6) | 704 (26.6) | 776 (28.7) | <0.001 |  |
| <b>Myocardial infarction</b>        | 138 (6.5)  | 156 (7.3)  | 83 (8.6)   | 63 (10.2)  | 216 (14.0) | 358 (12.2) | 362 (13.7) | 366 (13.5) | <0.001 |  |
| <b>Coronary revascularization</b>   | 113 (5.4)  | 162 (7.6)  | 97 (10.1)  | 59 (9.5)   | 182 (11.8) | 325 (11.0) | 314 (11.9) | 327 (12.1) | <0.001 |  |
| <b>Stroke</b>                       | 45 (2.1)   | 41 (1.9)   | 25 (2.6)   | 11 (1.8)   | 81 (5.3)   | 102 (3.5)  | 93 (3.5)   | 115 (4.3)  | <0.001 |  |
| <b>Carotid revascularization</b>    | 38 (1.8)   | 105 (4.9)  | 74 (7.7)   | 72 (11.6)  | 82 (5.3)   | 135 (4.6)  | 161 (6.1)  | 189 (7.0)  | <0.001 |  |
| <b>Ulcer/gangrene/amputation</b>    | 21 (1.0)   | 31 (1.5)   | 15 (1.6)   | 15 (2.4)   | 71 (4.6)   | 136 (4.6)  | 116 (4.4)  | 151 (5.6)  | <0.001 |  |
| <b>Lower limb revascularization</b> | 18 (0.9)   | 38 (1.8)   | 29 (3.0)   | 26 (4.2)   | 47 (3.1)   | 97 (3.3)   | 92 (3.5)   | 103 (3.8)  | <0.001 |  |
| <b>Comorbidities n (%)</b>          |            |            |            |            |            |            |            |            |        |  |
| <b>Any</b>                          | 311 (14.8) | 325 (15.2) | 142 (14.8) | 101 (16.3) | 371 (24.1) | 547 (18.6) | 478 (18.1) | 512 (18.9) | <0.001 |  |
| <b>COPD</b>                         | 96 (4.6)   | 56 (2.6)   | 29 (3.0)   | 17 (2.7)   | 77 (5.0)   | 145 (4.9)  | 113 (4.3)  | 141 (5.2)  | <0.001 |  |
| <b>Chronic liver disease</b>        | 120 (5.7)  | 177 (8.3)  | 86 (8.9)   | 69 (11.1)  | 179 (11.6) | 238 (8.1)  | 240 (9.1)  | 252 (9.3)  | <0.001 |  |
| <b>Cancer</b>                       | 124 (5.9)  | 121 (5.7)  | 36 (3.7)   | 22 (3.5)   | 155 (10.1) | 221 (7.5)  | 179 (6.8)  | 173 (6.4)  | <0.001 |  |

HbA<sub>1c</sub> = haemoglobin A<sub>1c</sub>; hypo- = patients not on agents causing hypoglycaemia; hypo+ = patients on agents causing hypoglycaemia; C1 = HbA<sub>1c</sub> <6.5%; C2 = HbA<sub>1c</sub> 6.5%-7.49%; C3 = HbA<sub>1c</sub> 7.5%-8.49%; C4 = HbA<sub>1c</sub> ≥8.5%; BMI = body mass index; BP = blood pressure; ACE-I = angiotensin converting enzyme inhibitor; ARB = angiotensin receptor blocker; eGFR = estimated glomerular filtration rate; DKD = diabetic kidney disease; DR = diabetic retinopathy; = CVD = cardiovascular disease; COPD = chronic obstructive pulmonary disease.

**Table S3.** Baseline clinical features of study participants by HbA<sub>1c</sub> target categories and use of agents causing hypoglycaemia.

| Variables                                       | Hypo-        |              |              | Hypo+        |              |               | P      |
|-------------------------------------------------|--------------|--------------|--------------|--------------|--------------|---------------|--------|
|                                                 | T1           | T2           | T3           | T1           | T2           | T3            |        |
| N (%)                                           | 2,154 (11.5) | 2,064 (17.2) | 1,608 (12.5) | 2,835 (26.2) | 2,557 (38.2) | 4,438 (24.3)  |        |
| Deaths, n (%)                                   | 247 (11.5%)  | 354 (17.2%)  | 201 (12.5%)  | 744 (26.2%)  | 976 (38.2%)  | 1,080 (24.3%) | <0.001 |
| Age, years                                      | 64.0±9.6     | 66.5±10.4    | 61.9±10.2    | 68.7±9.7     | 71.7±9.1     | 65.2±10.2     | <0.001 |
| Male gender, n (%)                              | 1,247 (57.9) | 1,201 (58.2) | 886 (55.1)   | 1,586 (55.9) | 1,617 (63.2) | 2,365 (53.3)  | <0.001 |
| Smoking, n (%)                                  |              |              |              |              |              |               | <0.001 |
| Never                                           | 1,204 (55.9) | 1,179 (57.1) | 888 (55.2)   | 1,633 (57.6) | 1,402 (54.8) | 2,543 (57.3)  |        |
| Former                                          | 645 (29.9)   | 621 (30.1)   | 406 (25.2)   | 790 (27.9)   | 834 (32.6)   | 1,111 (25.0)  |        |
| Current                                         | 305 (14.2)   | 264 (12.8)   | 314 (19.5)   | 412 (14.5)   | 321 (12.6)   | 784 (17.7)    |        |
| Diabetes duration, years                        | 8.5±8.5      | 9.5±9.6      | 9.8±9.4      | 15.8±10.1    | 16.3±10.5    | 14.9±9.6      | <0.001 |
| HbA <sub>1c</sub> , %                           | 6.87±0.51    | 6.04±0.59    | 8.53±1.43    | 7.34±0.54    | 6.37±0.67    | 9.03±1.36     | <0.001 |
| (mmol·mol <sup>-1</sup> )                       | (51.6±5.6)   | (42.5±6.4)   | (69.7±15.6)  | (56.7±5.9)   | (46.1±7.3)   | (75.2±14.9)   |        |
| BMI, kg·m <sup>-2</sup>                         | 29.4±5.0     | 28.8±4.9     | 30.2±5.5     | 28.3±4.9     | 27.8±4.6     | 29.5±5.5      | <0.001 |
| Waist circumference, cm                         | 103.5±10.1   | 102.2±9.9    | 105.0±11.1   | 101.1±9.9    | 100.2±9.4    | 103.4±11.0    | <0.001 |
| Triglycerides, mmol·l <sup>-1</sup>             | 1.55±0.98    | 1.43±0.83    | 1.76±1.16    | 1.48±0.82    | 1.41±0.88    | 1.73±1.14     | <0.001 |
| Total cholesterol, mmol·l <sup>-1</sup>         | 4.88±0.93    | 4.79±0.95    | 4.94±1.05    | 4.70±0.95    | 4.61±0.96    | 4.84±1.03     | <0.001 |
| HDL cholesterol, mmol·l <sup>-1</sup>           | 1.29±0.33    | 1.33±0.36    | 1.23±0.32    | 1.31±0.36    | 1.32±0.37    | 1.26±0.36     | <0.001 |
| LDL cholesterol, mmol·l <sup>-1</sup>           | 3.58±0.91    | 3.46±0.91    | 3.71±1.02    | 3.39±0.89    | 3.29±0.92    | 3.57±0.99     | <0.001 |
| Non-HDL cholesterol, mmol·l <sup>-1</sup>       | 2.89±0.82    | 2.81±0.82    | 2.92±0.88    | 2.72±0.82    | 2.66±0.83    | 2.79±0.87     | <0.001 |
| Systolic BP, mmHg                               | 136.6±16.7   | 136.7±17.0   | 137.3±17.6   | 139.7±18.6   | 138.3±18.6   | 138.6±18.4    | <0.001 |
| Diastolic BP, mmHg                              | 79.8±8.8     | 79.4±9.2     | 80.3±9.3     | 78.4±9.4     | 77.5±9.7     | 78.4±9.6      | <0.001 |
| Pulse pressure, mmHg                            | 56.8±14.6    | 57.3±14.7    | 57.0±14.8    | 61.3±16.1    | 60.8±16.4    | 60.1±15.9     | <0.001 |
| Anti-hyperglycaemic treatment, n (%)            |              |              |              |              |              |               |        |
| Lifestyle                                       | 810 (37.6)   | 927 (44.9)   | 376 (23.4)   | 0 (0.0)      | 0 (0.0)      | 0 (0.0)       | <0.001 |
| Insulin                                         | 0 (0.0)      | 0 (0.0)      | 0 (0.0)      | 972 (33.6)   | 860 (34.3)   | 2,092 (47.1)  | <0.001 |
| Non-insulin agents                              | 1,344 (62.4) | 1,137 (55.1) | 1,232 (76.6) | 1,863 (65.7) | 1,697 (66.4) | 2,346 (52.9)  | <0.001 |
| Metformin                                       | 1,310 (60.8) | 1,111 (53.8) | 1,181 (73.4) | 1,474 (52.0) | 1,084 (42.4) | 2,485 (56.0)  | <0.001 |
| Pioglitazone                                    | 89 (4.1)     | 52 (2.5)     | 121 (7.5)    | 92 (3.2)     | 40 (1.6)     | 160 (3.6)     | <0.001 |
| Acarbose                                        | 17 (0.8)     | 21 (1.0)     | 34 (2.1)     | 32 (1.1)     | 26 (1.0)     | 40 (0.9)      | <0.001 |
| Sulfonylureas                                   | 0 (0.0)      | 0 (0.0)      | 0 (0.0)      | 1,610 (56.8) | 1,314 (51.4) | 2,326 (52.4)  | <0.001 |
| Repaglinide                                     | 0 (0.0)      | 0 (0.0)      | 0 (0.0)      | 461 (16.3)   | 510 (19.9)   | 554 (12.5)    | <0.001 |
| Lipid-lowering treatment, n (%)                 | 948 (44.0)   | 972 (47.1)   | 670 (41.7)   | 1,366 (48.2) | 1,176 (46.0) | 2,106 (47.5)  | <0.001 |
| Anti-hypertensive treatment, n (%)              | 1,417 (65.8) | 1,475 (71.5) | 1,012(62.9)  | 2,087 (73.6) | 1,974 (77.2) | 3,107 (70.0)  | <0.001 |
| Albuminuria, mg·day <sup>-1</sup>               | 31.8±114.0   | 53.8±413.8   | 39.9±176.4   | 88.7±363.5   | 101.7±343.1  | 85.0±320.9    | <0.001 |
| Serum creatinine, µmol·l <sup>-1</sup>          | 75.1±29.2    | 77.8±26.5    | 74.3±21.2    | 83.1±33.6    | 92.8±50.4    | 80.4±30.9     | <0.001 |
| eGFR, ml·min <sup>-1</sup> ·1.73m <sup>-2</sup> | 85.5±17.0    | 82.3±19.3    | 87.1±18.6    | 77.5±20.9    | 71.9±22.3    | 80.8±21.6     | <0.001 |
| DKD phenotype, n (%)                            |              |              |              |              |              |               | <0.001 |
| No DKD                                          | 1,656 (76.9) | 1,520 (73.6) | 1,143 (71.1) | 1,692 (59.7) | 1,339 (52.4) | 2,634 (59.4)  |        |
| Albuminuric DKD with preserved eGFR             | 312 (14.5)   | 284 (13.8)   | 320 (19.9)   | 551 (19.4)   | 483 (18.9)   | 1,016 (22.9)  |        |
| Non-albuminuric DKD                             | 140 (6.5)    | 161 (7.8)    | 91 (5.7)     | 321 (11.3)   | 362 (14.2)   | 401 (9.0)     |        |

|                                          |              |              |              |              |              |              |        |
|------------------------------------------|--------------|--------------|--------------|--------------|--------------|--------------|--------|
| <b>Albuminuric DKD with reduced eGFR</b> | 46 (2.1)     | 99 (4.8)     | 54 (3.4)     | 271 (9.6)    | 373 (14.6)   | 387 (8.7)    |        |
| <b>DR, n (%)</b>                         |              |              |              |              |              |              | <0.001 |
| <b>No DR</b>                             | 2,000 (92.9) | 1,870 (90.6) | 1,385 (86.1) | 2,064 (72.8) | 1,825 (71.4) | 3,045 (68.6) |        |
| <b>Non-advanced DR</b>                   | 117 (5.4)    | 109 (5.3)    | 168 (10.4)   | 412 (14.5)   | 335 (13.1)   | 806 (18.2)   |        |
| <b>Advanced DR</b>                       | 37 (1.7)     | 85 (4.1)     | 55 (3.4)     | 359 (12.7)   | 397 (15.5)   | 587 (13.2)   |        |
| <b>CVD, n (%)</b>                        |              |              |              |              |              |              |        |
| <b>Any</b>                               | 291 (13.5)   | 478 (23.2)   | 215 (13.4)   | 713 (25.1)   | 979 (38.3)   | 944 (21.3)   | <0.001 |
| <b>Myocardial infarction</b>             | 125 (5.8)    | 221 (10.7)   | 94 (5.8)     | 355 (12.5)   | 482 (18.9)   | 465 (10.5)   | <0.001 |
| <b>Coronary revascularization</b>        | 134 (6.2)    | 208 (10.1)   | 89 (5.5)     | 313 (11.0)   | 409 (16.0)   | 426 (9.6)    | <0.001 |
| <b>Stroke</b>                            | 35 (1.6)     | 67 (3.2)     | 20 (1.2)     | 102 (3.6)    | 164 (6.4)    | 125 (2.8)    | <0.001 |
| <b>Carotid revascularization</b>         | 88 (4.1)     | 114 (5.5)    | 87 (5.4)     | 162 (5.7)    | 194 (7.6)    | 211 (4.8)    | <0.001 |
| <b>Ulcer/gangrene/amputation</b>         | 23 (1.1)     | 41 (2.0)     | 18 (1.1)     | 135 (4.8)    | 176 (6.9)    | 163 (3.7)    | <0.001 |
| <b>Lower limb revascularization</b>      | 33 (1.5)     | 46 (2.2)     | 32 (2.0)     | 89 (3.1)     | 125 (4.9)    | 125 (2.8)    | <0.001 |
| <b>Comorbidities n (%)</b>               |              |              |              |              |              |              |        |
| <b>Any</b>                               | 239 (11.1)   | 479 (23.2)   | 161 (10.0)   | 517 (18.2)   | 782 (30.6)   | 609 (13.7)   | <0.001 |
| <b>COPD</b>                              | 41 (1.9)     | 132 (6.4)    | 25 (1.6)     | 126 (4.4)    | 190 (7.4)    | 160 (3.6)    | <0.001 |
| <b>Chronic liver disease</b>             | 135 (6.3)    | 212 (10.3)   | 105 (6.5)    | 250 (8.8)    | 358 (14.0)   | 301 (6.8)    | <0.001 |
| <b>Cancer</b>                            | 75 (3.5)     | 187 (9.1)    | 41 (2.5)     | 201 (7.1)    | 317 (12.4)   | 210 (4.7)    | <0.001 |

HbA<sub>1c</sub> = haemoglobin A<sub>1c</sub>; hypo- = patients not on agents causing hypoglycaemia; hypo+ = patients on agents causing hypoglycaemia; T1 = HbA<sub>1c</sub> on-target ( $\leq 0.5\%$  below or above personalized goal); T2 = HbA<sub>1c</sub> below-target ( $> 0.5\%$  below personalized goal); T3 = HbA<sub>1c</sub> above-target ( $> 0.5\%$  above personalized goal); BMI = body mass index; BP = blood pressure; ACE-I = angiotensin converting enzyme inhibitor; ARB = angiotensin receptor blocker; eGFR = estimated glomerular filtration rate; DKD = diabetic kidney disease; DR = diabetic retinopathy; = CVD = cardiovascular disease; COPD = chronic obstructive pulmonary disease.

# The RIACE Study Group

## The RIACE Steering Committee

Giuseppe Pugliese (Coordinator), Giuseppe Penno (Secretary), Anna Solini, Enzo Bonora, Emanuela Orsi, Roberto Trevisan, Luigi Laviola, Antonio Nicolucci.

## Participating Diabetes Centres

1. Azienda Ospedaliera Sant'Andrea, Roma (Coordinating Centre): Giuseppe Pugliese, Lucilla Bollanti, Elena Alessi, Martina Vitale, and Tiziana Cirrito.
2. Ospedale Le Molinette, Torino: Paolo Cavallo-Perin, Gabriella Gruden, and Bartolomeo Lorenzati.
3. Ospedale San Luigi Gonzaga, Orbassano: Franco Cavalot, Mariella Trovati, Leonardo Di Martino, and Fabio Mazzaglia.
4. Ospedale San Raffaele, Milano: Giampaolo Zerbini, Valentina Martina, Silvia Maestroni, and Valentina Capuano.
5. IRCCS "Cà Granda – Ospedale Maggiore Policlinico", Milano: Emanuela Orsi, Eva Palmieri, Elena Lunati, Valeria Grancini, and Veronica Resi.
6. Ospedale San Paolo, Milano: Antonio Pontiroli, Annamaria Veronelli, and Barbara Zecchini.
7. Ospedale San Giuseppe, Milano: Maura Arosio, Laura Montefusco, Antonio Rossi, and Guido Adda.
8. ASST - Ospedale Papa Giovanni XXIII, Bergamo: Roberto Trevisan, Anna Corsi, and Mascia Albizzi.
9. Ospedale Maggiore, Verona: Enzo Bonora, and Giacomo Zoppini.
10. Policlinico Universitario, Padova: Angelo Avogaro, and Monica Vedovato.
11. Ospedale Cisanello, Azienda Ospedaliero-Universitaria Pisana, Pisa: Giuseppe Penno, Laura Pucci, Daniela Lucchesi, Eleonora Russo, and Monia Garofolo.
12. Ospedale Santa Chiara, Azienda Ospedaliero-Universitaria Pisana, Pisa: Anna Solini.
13. Ospedale Le Scotte, Siena: Francesco Dotta, Cecilia Fondelli, and Laura Nigi.
14. Policlinico Umberto I, Roma: Susanna Morano, Tiziana Filardi, Irene Turinese, and Marco Rossetti.
15. Ospedale S. Maria Goretti, Latina: Raffaella Buzzetti and Chiara Foffi.
16. Ospedali Riuniti, Foggia: Mauro Cignarelli, Olga Lamacchia, Sabina Pinnelli, and Lucia Monaco.
17. Policlinico Universitario, Bari: Francesco Giorgino, Luigi Laviola, and Annalisa Natalicchio.
18. Policlinico Mater Domini, Catanzaro: Giorgio Sesti and Francesco Andreozzi.
19. Policlinico Monserrato, Cagliari: Marco Giorgio Baroni, Giuseppina Frau, and Alessandra Boi.
